# Supplementary material
Source: PubMed Central journal article supplement (PMC2836683)
Supplement: 0912516107_pnas.200912516SI.pdf [file 0912516107_pnas.200912516SI.pdf]

# Supporting Information

Kuromori et al. 10.1073/pnas.0912516107

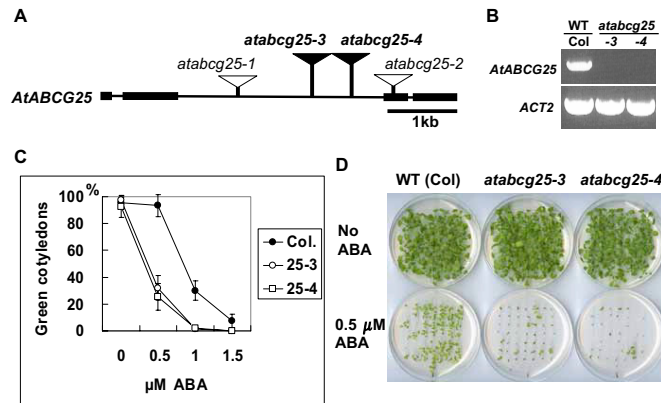

**Fig. S1.** *atabcg25-3* and *atabcg25-4* mutant alleles and phenotypes. (A) Insertional mutation sites of two additional *atabcg25* alleles. Square boxes represent exons, and black bars represent introns. T-DNA insertion sites in *atabcg25-3* (SALK\_098823) and *atabcg25-4* (SALK\_128331) are shown by black triangles. (B) RT-PCR analysis of *AtABCG25* transcripts in wild-type plants and in two additional *atabcg25* mutants. Total RNAs were prepared from seedlings of wild-type plants (Col) and two *atabcg25* mutants (*atabcg25-3* and *atabcg25-4*). *Actin2* (*ACT2*) was used as a reference. (C and D) ABA-hypersensitive phenotype of *atabcg25-3* and *atabcg25-4*. Postgerminative growth in different concentrations of ABA was scored at day 11 (C). Values are shown as mean  $\pm$  SD of 50 seeds (obtained from three independent experiments). Photographs show wild-type and *atabcg25* mutant seedlings germinated in the presence of 0.5  $\mu$ M ABA (D). Fifty seeds of each type were sown and incubated for 16 days.

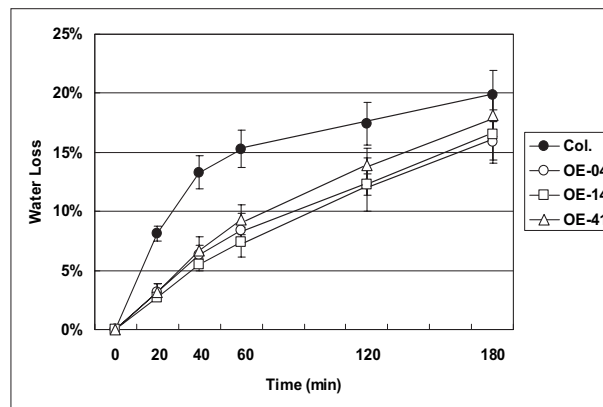

**Fig. S2.** Transparency ratio of *AtABCG25*-overexpressing plants. The leaves of three 35S::*AtABCG25* transgenic lines (OE-04, OE-14, and OE-41) and a wild-type plant (Col) were removed at 6–7 weeks. Water loss from the leaves was measured as a percentage of the initial flesh weight. Values are shown as mean  $\pm$  SD of five detached leaves (obtained from three independent plants).
